# Supplementary material
Source: PubMed Central journal article supplement (PMC2943328)
Supplement: supp_M110.120329_jbc.M110.120329-1.pdf [file supp_M110.120329_jbc.M110.120329-1.pdf]

# Study of the Individual Cytochrome b<sub>5</sub> and Cytochrome b<sub>5</sub> Reductase Domains of Ncb5or Reveals a Unique Heme Pocket and a Possible Role of the CS Domain

Bin Deng<sup>2</sup>, Sudharsan Parthasarathy<sup>5</sup>, WenFang Wang<sup>2</sup>, Brian R. Gibney<sup>8</sup>, Kevin P. Battaile<sup>7</sup>,  
Scott Lovell<sup>6</sup>, David R. Benson<sup>4,5</sup>, Hao Zhu<sup>1,2,3</sup>

From Department of Clinical Laboratory Sciences<sup>1</sup>, Physical Therapy and Rehabilitation Science<sup>2</sup>,  
Biochemistry and Molecular Biology<sup>3</sup>, University of Kansas Medical Center, Kansas City, KS 66160  
Department of Chemistry<sup>4</sup>, Molecular Biosciences<sup>5</sup>, University of Kansas, Lawrence, KS 66045  
Protein Structure Laboratory<sup>6</sup>, Structural Biology Center, University of Kansas, Lawrence, KS 66047  
IMCA-CAT<sup>7</sup>, Advanced Photon Source, Argonne National Laboratory, Argonne, IL 60439  
Department of Chemistry<sup>8</sup>, Brooklyn College, Brooklyn, NY 11210  
Running Head: Unique heme pocket and possible role of CS in human Ncb5or

Address correspondence to: Hao Zhu, Ph.D., 3901 Rainbow Blvd., MSN 4048G-Eaton, Kansas City, KS 66160, Phone: (913)-588-2989, FAX: (913)-588-5222, E-mail: [hzhu@kumc.edu](mailto:hzhu@kumc.edu); David R. Benson, Ph.D., 1251 Wescoe Hall Drive, 2010 Malott Hall, Lawrence, KS 66045, Phone: (785)-864-4090, FAX: (785)-864-5396, E-mail: [drb@ku.edu](mailto:drb@ku.edu).

## SUPPELMENTAL DATA

### FIGURE LEGENDS

**Supplemental Figure 1.** Sequence alignment of Cyb5A from vertebrates. Residue numbers and helices of human Cyb5A corresponding to those in Figure 1B are labeled. Conserved amino acid residues in each group are marked by “\*” (identical, heme-ligands in red) or “-” (chemically similar). All are annotated from genomic sequences except those from human, mouse, rat, bovine, horse, pig, rabbit, Xenopus and Zebrafish are confirmed by transcript or protein sequences. GenBank accession numbers are: Human (NP\_683725), Chimpanzee (XP\_001135885), Monkey (XP\_001083378), Orangutan (ENSPPYP00000010369), Guinea pig (ENSCPOP00000010893), Mouse (NP\_080073), Rat (NP\_071581), Bovine (NP\_776458), Horse (NP\_001153204), Pig (NP\_001001770), Goat (ABQ12619), Dog (XP\_533373), Rabbit (P00169), Opossum (XP\_001373630), Zebrafish (XP\_002195467), Chicken (NP\_001001748), Xenopus laevis (NP\_001086707), Xenopus tropicalis (NP\_001015979), Rice fish (ENSORLT00000004278), Zebrafish (NP\_998300), salmon (ACI66502), pufferfish (ENSTNIP00000008519), Fugu (ENSTRUP00000013474), Stickleback (ENSGACP00000002650), C. Armatus (CAE75863), Rainbow smelt (ACO09548). A 92% identity or a 96% similarity is found for human and rat Cyb5A sequences.

**Supplemental Figure 2.** Sequence alignment of Ncb5or-b<sub>5</sub> core from animals. Residue numbers and helices of human Ncb5or-b<sub>5</sub> corresponding to those in Figure 1B are labeled. Conserved amino acid residues in each group are marked by “\*” (identical, heme-ligands in red) or “-” (chemically similar). All sequences are annotated from genomic sequences except sequences of human, mouse and rat have been confirmed by cloned cDNAs. Ncb5or is also named Cyb5R3, b5/b5R, and b5+b5R. GenBank accession numbers are: Human (NM\_016230), Chimpanzee (XM\_518614), Monkey (XM\_001085835), Guinea pig

(EB369672), Mouse (NM\_024195), Rat (NM\_133427), Bovine (NM\_001038159), Horse (XM\_001499913), Sheep (DY519717), Dog (XM\_532219), Squirrel (CO734025), Platypus (XM\_001512881), Opossum (XM\_001375853), Zebrafinch (XM\_002188637), Chicken (XM\_001233870), *Xenopus laevis* (NM\_001016756), Little skate (CV222314), Rice fish (AM140533), Zebrafish (NM\_001020660), Salmon (DY707237), Stickleback (DN714575), Pimephales (DT192112), Pea aphid (XM\_001948299), Beetle (XM\_963135), Honeybee (XM\_394412), Jewel Wasp (XM\_001601866), *Drosophila* (NM\_137575), Louse (XM\_002428283), Deer tick (XM\_002401084), Mosquito (XM\_001650886), Tunicate (XR\_053035), Lancelet (XM\_002603916), *C.elegans* (NM\_001026613), *Teladorsagia* (CB038604), *Trichuris* (BM277379), Sea urchin (CD307914), Coral (EZ038676), Sea anemone (DV081463), *Trichoplax* (XM\_002112883), Hydra (XM\_002165807). A 93% identity or a 100% similarity is found for human and rat Ncb5or-b5 sequences.

**Supplemental Figure 3.** 2Fo-Fc electron density map contoured at  $1\sigma$  showing the two orientations of the heme molecules in Ncb5or-b<sub>5</sub> associated with subunit A (left) and subunit B (right).

**Supplemental Figure 4.** Thermostability of wild-type Ncb5or-b<sub>5</sub> and its two mutants, b<sub>5</sub>W114A and b<sub>5</sub>R113A. The percent of heme loss (Y axis) was monitored by the decrease in A413 and plotted as a function of temperature. Thermal denaturation experiments were performed on a Varian Carey 100 Bio UV/Visible spectrophotometer equipped with a Peltier-thermostated multiple cell holder and a dedicated temperature probe accessory ( $\pm 0.1$  °C). Solutions were buffered to pH 7.0 using 50 mM potassium phosphate. Experiments were performed in quartz cuvettes of 1 cm path length and 1 mL sample volume, equipped with tight-fitting PTFE lids. The temperature was increased in increments of 2 °C, and samples were equilibrated for 5 min after reaching each desired temperature. Thermal denaturation midpoints ( $T_m$  values) were obtained by fitting plots of absorbance at the Soret band  $\lambda_{max}$  (412 nm) vs. temperature to a previously described equation describing a two-state equilibrium (1).  $T_m$  (mid-point temperature) = 72.0 (Ncb5or-b<sub>5</sub>), 73.4 (Ncb5or-b<sub>5</sub>R113A), 71.5 (Ncb5or-b<sub>5</sub>W114A), 73.5 (human Cyb5A).

**Supplemental Figure 5.** Circular dichroism (CD) spectra of human Ncb5or-b<sub>5</sub>. (A) Far UV (190 – 250 nm) and (B) visible (350 – 500 nm) spectra of wild-type Ncb5or-b<sub>5</sub> and its two mutants, b<sub>5</sub>W114A and b<sub>5</sub>R113A, monitored at a concentration of 17.4, 14.5, and 15.3  $\mu$ M heme, respectively. CD spectra were recorded on a JASCO-815 spectropolarimeter equipped with a Peltier thermostated cell holder.(2) Solutions were buffered to pH 7.0 using 10 mM sodium phosphate. All spectra were obtained at 0.1 nm with a response time of 4 sec and a scan rate of 50 nm/min at room temperature. Final spectra represent the average of at least five scans. Background correction was accomplished by subtraction of a spectrum recorded at the same temperature and containing only buffer. Far-UV spectra are reported in terms of mean residue ellipticity ( $[\theta]$ , in  $\text{deg}\cdot\text{cm}^2\cdot\text{dmol}^{-1}$ ), calculated as  $[\theta] = [\theta]_{\text{obs}}[\text{MRW}/(10lc)]$  where  $[\theta]_{\text{obs}}$  is the ellipticity measured in millidegrees, MRW is the polypeptide mean residue molecular weight (molecular weight divided by the number of amino acids),  $c$  = sample concentration in mg/mL, and  $l$  = optical path length of the cell in cm. Near-UV and visible region spectra are reported in terms of molar ellipticity ( $[\theta]$ , in  $\text{deg}\cdot\text{cm}^2\cdot\text{dmol}^{-1}$ ), calculated as  $[\theta] = [\theta]_{\text{obs}}[\text{MW}/(10lc)]$  where MW is the molecular weight of the polypeptide.

**Supplemental Table 1.** Crystallographic data for human Ncb5or-b<sub>5</sub> refined to 1.25 Å resolution.

---

|                                                        |                                                   |
|--------------------------------------------------------|---------------------------------------------------|
| <b>Data Collection</b>                                 |                                                   |
| Unit-cell parameters (Å, °)                            | $a = 38.48, b = 56.37, c = 42.56, \beta = 100.67$ |
| Space group                                            | $P2_1$                                            |
| Resolution (Å) <sup>1</sup>                            | 30.0-1.25 (1.28-1.25)                             |
| Wavelength (Å)                                         | 1.0000                                            |
| Temperature (K)                                        | 100                                               |
| Observed reflections                                   | 185,062                                           |
| Unique reflections                                     | 49,981                                            |
| $\langle I/\sigma(I) \rangle$ <sup>1</sup>             | 13.0 (1.9)                                        |
| Completeness (%) <sup>1</sup>                          | 99.0 (93.6)                                       |
| Redundancy <sup>1</sup>                                | 3.8 (3.1)                                         |
| $R_{\text{sym}}(\%)$ <sup>1,2</sup>                    | 5.8 (72.4)                                        |
| <b>Refinement</b>                                      |                                                   |
| Resolution (Å)                                         | 30.0-1.25                                         |
| Reflections (working/test)                             | 46,492 / 2,489                                    |
| $R_{\text{factor}} / R_{\text{free}}(\%)$ <sup>3</sup> | 14.7 / 17.3                                       |
| No. of atoms (protein (A:B) / Heme / sulfate /water)   | 742:743 / 172 / 10 / 145                          |
| <b>Model Quality</b>                                   |                                                   |
| R.m.s deviations                                       |                                                   |
| Bond lengths (Å)                                       | 0.013                                             |
| Bond angles (°)                                        | 1.477                                             |
| Average $B$ factor (Å <sup>2</sup> )                   |                                                   |
| All Atoms                                              | 15.9                                              |
| Protein (chain A/B)                                    | 15.2 / 15.3                                       |
| Heme                                                   | 11.0                                              |
| Sulfate                                                | 27.7                                              |
| Water                                                  | 28.0                                              |
| Coordinate error based on $R_{\text{free}}$ (Å)        | 0.043                                             |
| Ramachandran Plot (chain A/B)                          |                                                   |
| Most favored (%)                                       | 97.1                                              |
| Additionally allowed (%)                               | 2.9                                               |

---

1) Values in parenthesis are for the highest resolution shell.

2)  $R_{\text{sym}} = \sum_{hkl} \sum_i |I_i(hkl) - \langle I(hkl) \rangle| / \sum_{hkl} \sum_i I_i(hkl)$ , where  $I_i(hkl)$  is the intensity measured for the  $i$ th reflection and  $\langle I(hkl) \rangle$  is the average intensity of all reflections with indices  $hkl$ .

3)  $R_{\text{factor}} = \sum_{hkl} ||F_{\text{obs}}(hkl)| - |F_{\text{calc}}(hkl)|| / \sum_{hkl} |F_{\text{obs}}(hkl)|$ ;  $R_{\text{free}}$  is calculated in an identical manner using 5% of randomly selected reflections that were not included in the refinement.

**Supplemental Table 2.** Summary of interplanar dihedral angles and EPR signals of Ncb5or and other members of the cytochrome b<sub>5</sub> superfamily. Interplanar dihedral angles of bis-histidine ligands were calculated with Mercury (<http://www.ccdc.cam.ac.uk/products/mercury/>). N/A: not available.

| Protein Name (source)                    | PDB # | $g_{\max}$ or $g_z$ | Interplanar dihedral angles                            | Reference  |
|------------------------------------------|-------|---------------------|--------------------------------------------------------|------------|
| Ncb5or (human)                           | 3LF5  | 3.56                | 83.2° / 81.3° (His <sup>89</sup> ,His <sup>112</sup> ) | This study |
| Ncb5or (rat)                             | N/A   | 3.54                | N/A                                                    | (3)        |
| Cyb5A (human)                            | N/A   | 3.09                | N/A                                                    | This study |
| Cyb5A (bovine)                           | 1CYO  | 3.1                 | 21.2° (His <sup>44</sup> ,His <sup>68</sup> )          | (4,5)      |
| Cyb5A (rat)                              | N/A   | 3.05                | N/A                                                    | (3)        |
| Cyb5B (rat)                              | 1B5M  | 3.03                | 11.9° (His <sup>42</sup> ,His <sup>66</sup> )          | (6,7)      |
| Cytochrome b <sub>5</sub> (M. domestica) | 2IBJ  | 3.07                | 23.8° (His <sup>39</sup> ,His <sup>63</sup> )          | (2,8)      |
| Cytochrome b <sub>5</sub> (A. suum)      | 1X3X  | N/A                 | 46.1° (His <sup>38</sup> ,His <sup>62</sup> )          | (9)        |
| Cytochrome b558 (E. vacuolata)           | 1CXY  | N/A                 | 43.9° (His <sup>42</sup> ,His <sup>70</sup> )          | (10)       |
| Sulfite oxidase (chicken)                | 1SOX  | 2.93                | 9.6° (His <sup>40</sup> ,His <sup>65</sup> )           | (11,12)    |
| Cytochrome b <sub>2</sub> (yeast)        | 1LTD  | 2.99                | 42.3° (His <sup>43</sup> ,His <sup>66</sup> )          | (13,14)    |
| Nitrate reductase (spinach)              | N/A   | 2.98                | N/A                                                    | (15)       |

**Supplemental Table 3.** Kinetic properties of Cyb5A mutants tested for electrostatic interaction with Cyb5R3. Heme ligands are His<sup>44</sup> and His<sup>68</sup> in Cyb5A, corresponding to His<sup>89</sup> and His<sup>112</sup> in Ncb5or, respectively. <sup>a</sup> Both  $k_{cat}$  and  $K_M$  values are the ratio against that of wild-type Cyb5A. <sup>b</sup> N116 is displaced relative to D71 given the difference in local secondary structure, but it is the closest residue spatially and is pointed generally in the same direction.

| Cyb5A                                 | $k_{cat}$ <sup>a</sup> | $K_M$ <sup>a</sup> | Helix          | Residue in Ncb5or | Ref. |
|---------------------------------------|------------------------|--------------------|----------------|-------------------|------|
| E42A                                  | 1.0                    | 1.2                | $\alpha 2$     | E87               | (16) |
| E43A                                  | 1.0                    | 3.1                | $\alpha 2$     | Y88               | (16) |
| E48A                                  | 1.3                    | 1.7                | $\alpha 3$     | E93               | (17) |
| E49A                                  | 0.8                    | 0.6                | $\alpha 3$     | D94               | (17) |
| E48A/E49A                             | 1.3                    | 1.1                | $\alpha 3$     | -                 | (17) |
| E53A                                  | 1.2                    | 1.2                | $\alpha 3$     | R98               | (17) |
| E61A                                  | 1.3                    | 1.4                | $\alpha 4$     | E106              | (17) |
| E64A                                  | 1.0                    | 1.0                | $\alpha 4$     | D109              | (16) |
| D65A                                  | 1.0                    | 1.5                | $\alpha 4$     | Q110              | (17) |
| D71A                                  | 0.7                    | 6.4                | $\alpha 5$     | N116 <sup>b</sup> | (16) |
| E74A                                  | 1.1                    | 1.8                | $\alpha 5$     | S119              | (16) |
| E48/E49/E53/E61/D65→A                 | 0.9                    | 1.4                | $\alpha 3,4$   | -                 | (17) |
| E42/E43/E48/E49/E53/D58/E61/E64/D65→A | 0.9                    | 6.1                | $\alpha 2,3,4$ | -                 | (17) |





Supplemental Figure 3.

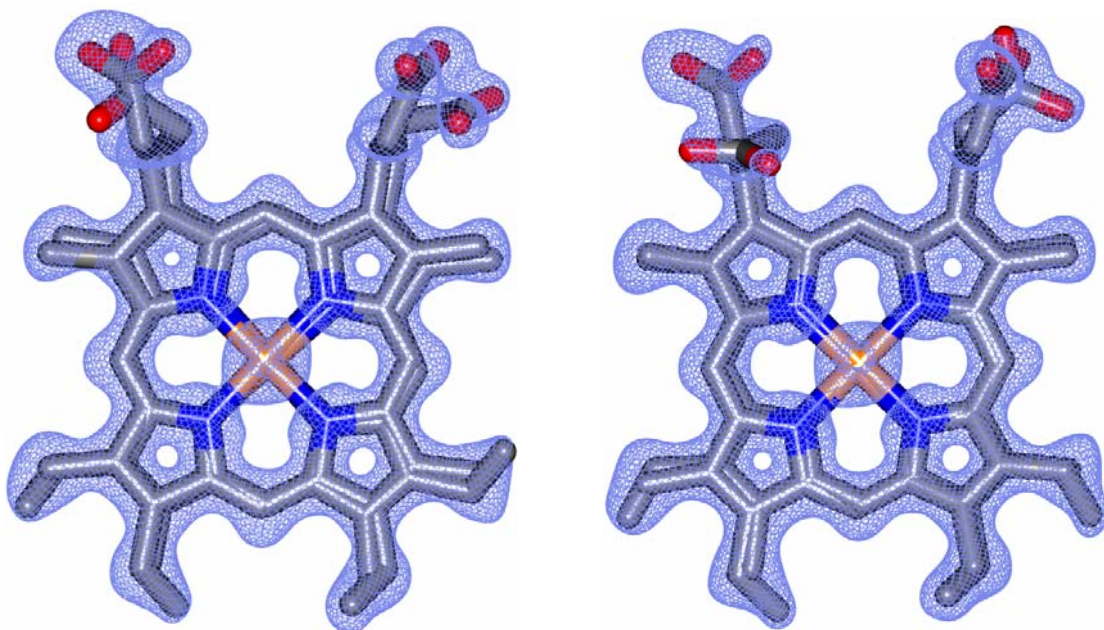



Supplemental Figure 4.

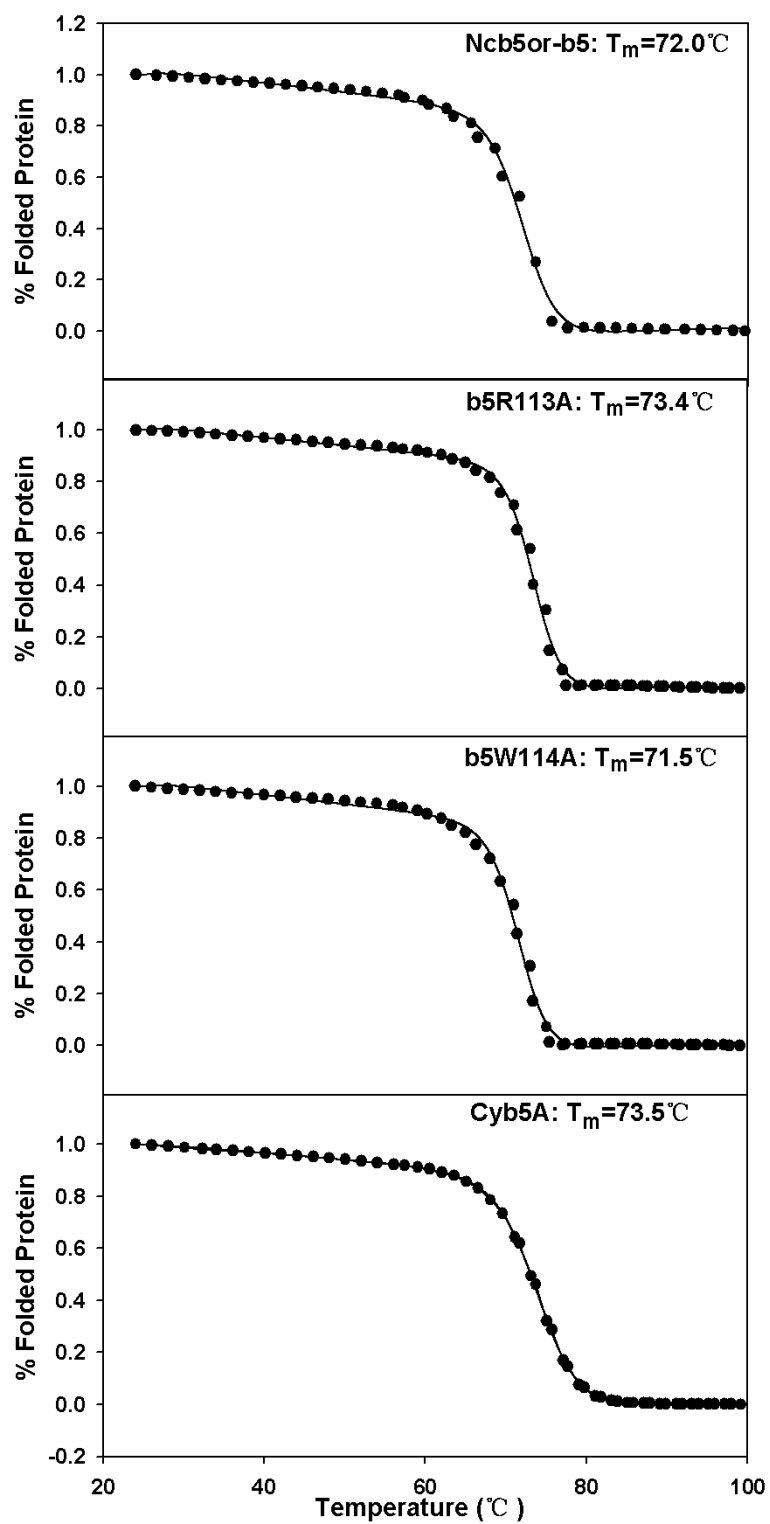

Supplemental Figure 5.

A.

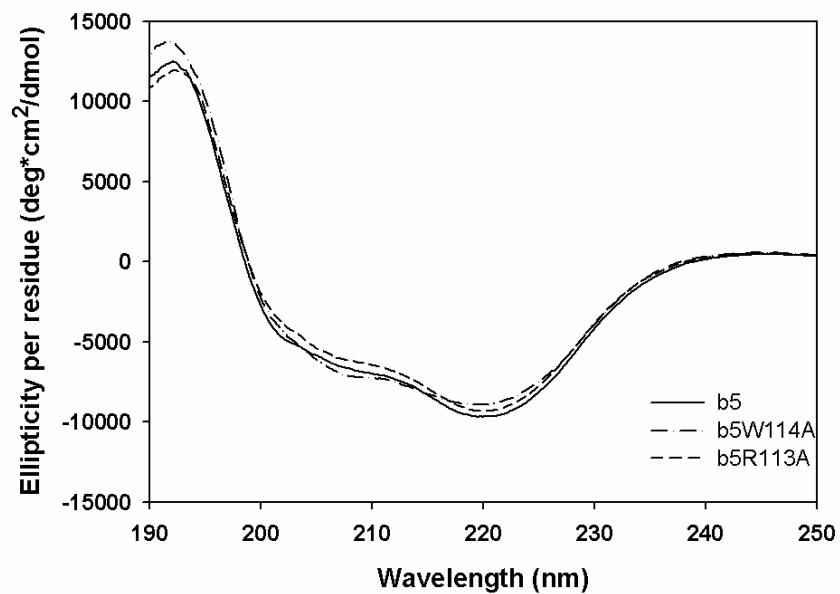

B.

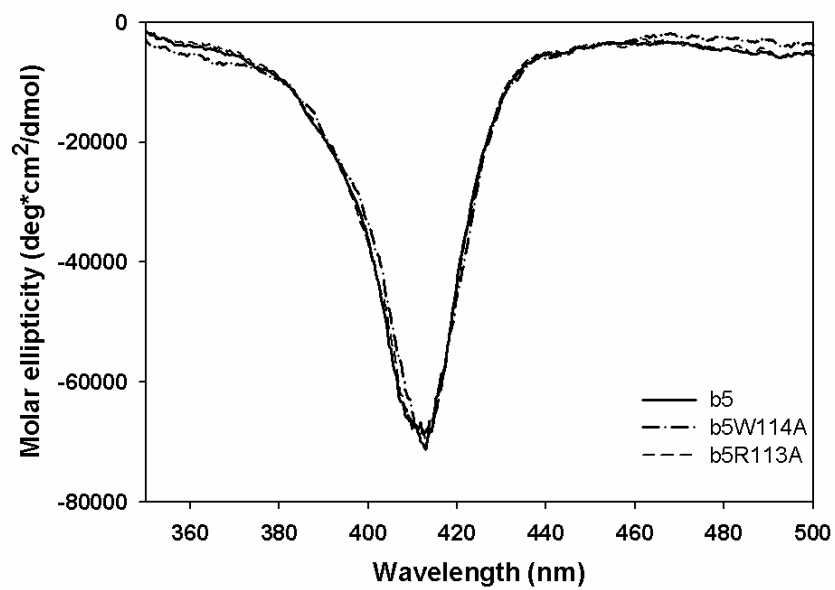

## REFERENCES

1. Constans, A. J., Mayer, M. R., Sukits, S. F., and Lecomte, J. T. (1998) *Protein Sci* **7**(9), 1983-1993
2. Wang, L., Cowley, A. B., Terzyan, S., Zhang, X., and Benson, D. R. (2007) *Proteins* **67**(2), 293-304
3. Davis, C. A., Dhawan, I. K., Johnson, M. K., and Barber, M. J. (2002) *Arch Biochem Biophys* **400**(1), 63-75
4. Durley, R. C., and Mathews, F. S. (1996) *Acta Crystallogr D Biol Crystallogr* **52**(Pt 1), 65-76
5. Davydov, R., and Hoffman, B. M. (2008) *J Biol Inorg Chem* **13**(3), 357-369
6. Rivera, M., Barillas-Mury, C., Christensen, K. A., Little, J. W., Wells, M. A., and Walker, F. A. (1992) *Biochemistry* **31**(48), 12233-12240.
7. Rodriguez-Maranon, M. J., Qiu, F., Stark, R. E., White, S. P., Zhang, X., Foundling, S. I., Rodriguez, V., Schilling, C. L., 3rd, Bunce, R. A., and Rivera, M. (1996) *Biochemistry* **35**(50), 16378-16390
8. Guzov, V. M., Houston, H. L., Murataliev, M. B., Walker, F. A., and Feyereisen, R. (1996) *J Biol Chem* **271**(43), 26637-26645.
9. Yokota, T., Nakajima, Y., Yamakura, F., Sugio, S., Hashimoto, M., and Takamiya, S. (2006) *Biochem J* **394**(Pt 2), 437-447
10. Kostanjevecki, V., Leys, D., Van Driessche, G., Meyer, T. E., Cusanovich, M. A., Fischer, U., Guisez, Y., and Van Beeumen, J. (1999) *J Biol Chem* **274**(50), 35614-35620
11. Kessler, D. L., and Rajagopalan, K. V. (1972) *J Biol Chem* **247**(20), 6566-6573
12. Kisker, C., Schindelin, H., Pacheco, A., Wehbi, W. A., Garrett, R. M., Rajagopalan, K. V., Enemark, J. H., and Rees, D. C. (1997) *Cell* **91**(7), 973-983
13. Mowat, C. G., Miles, C. S., Munro, A. W., Cheesman, M. R., Quaroni, L. G., Reid, G. A., and Chapman, S. K. (2000) *J Biol Inorg Chem* **5**(5), 584-592.
14. Tegoni, M., and Cambillau, C. (1994) *Protein Sci* **3**(2), 303-313
15. Barber, M. J., Desai, S. K., Marohnic, C. C., Hernandez, H. H., and Pollock, V. V. (2002) *Arch Biochem Biophys* **402**(1), 38-50
16. Kawano, M., Shirabe, K., Nagai, T., and Takeshita, M. (1998) *Biochem Biophys Res Commun* **245**(3), 666-669
17. Shirabe, K., Nagai, T., Yubisui, T., and Takeshita, M. (1998) *Biochim Biophys Acta* **1384**(1), 16-22
